# Supplementary material
Source: Springer Nature journal article supplement (https://www.springermedizin.de/resource/supplementary/12906_2001_8_MOESM2_ESM.pdf/9519316)

**A IL6**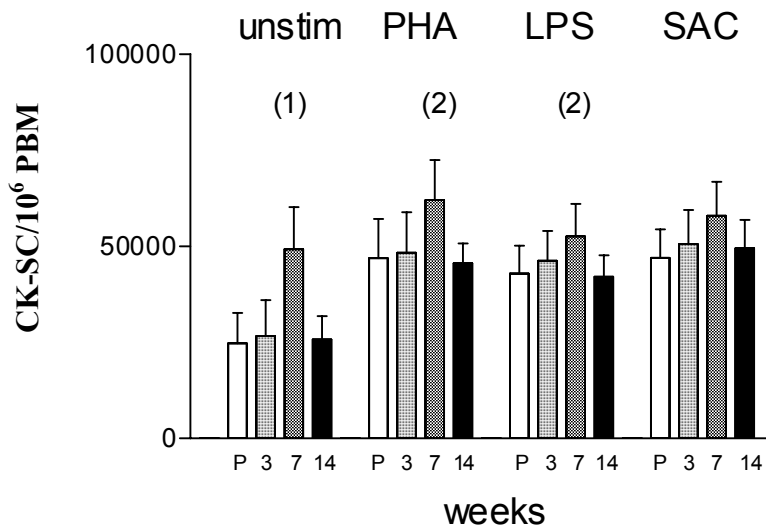**B TNF $\alpha$** 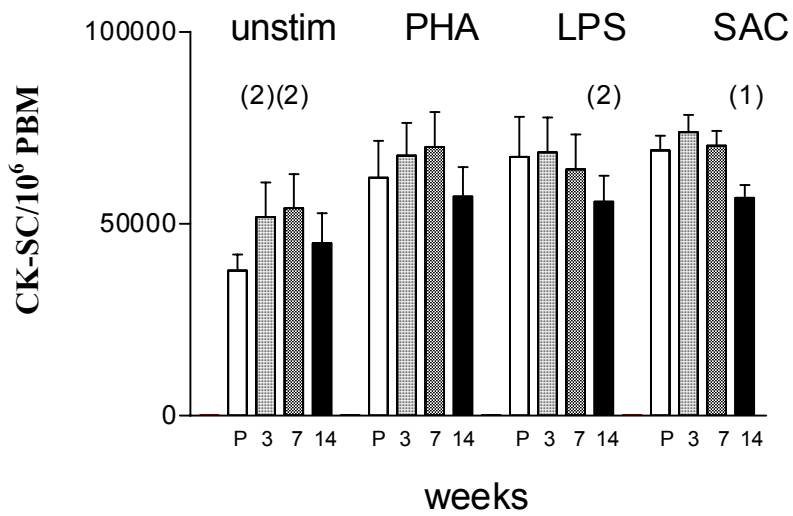

Supplement: MOESM2 [file 9519316]
